# Supplementary material
Source: PubMed Central journal article supplement (PMC5136333)
Supplement: NIHMS826975-supplement-1.pdf [file NIHMS826975-supplement-1.pdf]

## Supplementary Tables

**Supplementary Table 1. Logistic Regression Model Results of CR vs. PR/SD/PR by Baseline Biomarker Quartile Level, adjusted for intervention arm**

|                        |                            | BAL                  | Plasma                    |
|------------------------|----------------------------|----------------------|---------------------------|
|                        | Quartiles                  | Odds Ratio (P-value) | Odds Ratio (P-value)      |
| CC-16 (ng/mL)          | Q2 vs. Q1                  | 5.83 (0.74)          | 0.57 (0.15)               |
|                        | Q3 vs. Q1                  | 18.52 (0.10)         | 3.02 (0.37)               |
|                        | Q4 vs. Q1                  | 25.18 (0.03)         | 7.17 (0.01)               |
|                        | Trend Test P-value < 0.001 |                      | Trend Test P-value = 0.01 |
| GSH (umol/L)           | Q2 vs. Q1                  | 0.67 (0.16)          | ND                        |
|                        | Q3 vs. Q1                  | 0.36 (0.71)          | ND                        |
|                        | Q4 vs. Q1                  | 0.02 (0.04)          | ND                        |
|                        | Trend Test P-value = 0.01  |                      | Trend Test P-value = N/A  |
| IL-6 (pg/mL)           | Q2 vs. Q1                  | 0.46 (0.36)          | 2.64 (0.29)               |
|                        | Q3 vs. Q1                  | 1.65 (0.16)          | 4.41 (0.03)               |
|                        | Q4 vs. Q1                  | 0.62 (0.61)          | 0.44 (0.13)               |
|                        | Trend Test P-value = 0.46  |                      | Trend Test P-value = 0.53 |
| MPO (ng/mL)            | Q2 vs. Q1                  | 0.49 (0.56)          | 0.78 (0.43)               |
|                        | Q3 vs. Q1                  | 0.18 (0.10)          | 0.70 (0.58)               |
|                        | Q4 vs. Q1                  | 2.97 (0.01)          | 0.13 (0.09)               |
|                        | Trend Test P-value = 0.08  |                      | Trend Test P-value = 0.07 |
| SFTPD (ng/mL)          | Q2 vs. Q1                  | 3.04 (0.52)          | 1.04 (0.286)              |
|                        | Q3 vs. Q1                  | 3.12 (0.46)          | 0.16 (0.094)              |
|                        | Q4 vs. Q1                  | 2.27 (0.92)          | 0.81 (0.58)               |
|                        | Trend Test P-value = 0.20  |                      | Trend Test P-value = 0.24 |
| CRP (ng/mL)            | Q2 vs. Q1                  | ND                   | 0.81 (0.67)               |
|                        | Q3 vs. Q1                  | ND                   | 0.62 (0.94)               |
|                        | Q4 vs. Q1                  | ND                   | 0.35 (0.31)               |
|                        | Trend Test P-value = N/A   |                      | Trend Test P-value = 0.17 |
| CCL18 (ng/mL)          | Q2 vs. Q1                  | 2.41 (0.75)          | 0.30 (0.30)               |
|                        | Q3 vs. Q1                  | 2.97 (0.45)          | 1.25 (0.11)               |
|                        | Q4 vs. Q1                  | 2.41 (0.75)          | 0.28 (0.26)               |
|                        | Trend Test P-value = 0.20  |                      | Trend Test P-value = 0.33 |
| Nitrotyrosine (mmol/L) | Q2 vs. Q1                  | ND                   | 1.32 (0.93)               |
|                        | Q3 vs. Q1                  | ND                   | 1.27 (0.99)               |
|                        | Q4 vs. Q1                  | ND                   | 1.52 (0.71)               |
|                        | Trend Test P-value = N/A   |                      | Trend Test P-value = 0.37 |
| CCL-2 (pg/mL)          | Q2 vs. Q1                  | 3.02 (0.75)          | 0.61 (0.99)               |
|                        | Q3 vs. Q1                  | 6.07 (0.34)          | 0.77 (0.65)               |
|                        | Q4 vs. Q1                  | 9.81 (0.06)          | 0.30 (0.25)               |
|                        | Trend Test P-value = 0.01  |                      | Trend Test P-value = 0.17 |

\* Cochran Armitage Test of Trend (1-sided); Qi = ith quartile;

Abbreviations: BAL = Bronchoalveolar Lavage; ND=Not Detectable;

CC-16, Clara cell protein-16; CCL-2, chemokine (C-C motif) ligand 2; CCL18, chemokine (C-C motif) ligand 18; CRP, c-reactive protein; GSH, total glutathione; IL-6, interleukin-6; MPO, myeloperoxidase, SFTPD, surfactant protein D.
