# Supplementary material
Source: PubMed Central journal article supplement (PMC5136333)
Supplement: NIHMS826975-supplement-2.pdf [file NIHMS826975-supplement-2.pdf]

**Supplementary Table 2. Logistic Regression Model Results of CR/PR vs. SD/PR by Baseline Biomarker Quartile Level, adjusted for intervention arm**

|               |                           | BAL                  | Plasma                    |
|---------------|---------------------------|----------------------|---------------------------|
|               | Quartiles                 | Odds Ratio (P-value) | Odds Ratio (P-value)      |
| CC-16         | Q2 vs. Q1                 | 1.6 (0.32)           | 0.79 (0.23)               |
|               | Q3 vs. Q1                 | 4.47 (0.25)          | 1.63 (0.74)               |
|               | Q4 vs. Q1                 | 6.83 (0.05)          | 3.11 (0.07)               |
|               | Trend Test P-value = 0.01 |                      | Trend Test P-value = 0.05 |
| GSH           | Q2 vs. Q1                 | 0.62 (0.79)          | ND                        |
|               | Q3 vs. Q1                 | 0.68 (0.63)          | ND                        |
|               | Q4 vs. Q1                 | 0.21 (0.08)          | ND                        |
|               | Trend Test P-value = 0.08 |                      | Trend Test P-value = N/A  |
| IL-6          | Q2 vs. Q1                 | 0.84 (0.65)          | 1.53 (0.31)               |
|               | Q3 vs. Q1                 | 1.28 (0.64)          | 1.53 (0.31)               |
|               | Q4 vs. Q1                 | 1.08 (0.93)          | 0.41 (0.09)               |
|               | Trend Test P-value = 0.42 |                      | Trend Test P-value = 0.22 |
| MPO           | Q2 vs. Q1                 | 0.83 (0.64)          | 1.13 (0.09)               |
|               | Q3 vs. Q1                 | 0.56 (0.20)          | 0.78 (0.36)               |
|               | Q4 vs. Q1                 | 2.53 (0.06)          | 0.07 (0.02)               |
|               | Trend Test P-value = 0.19 |                      | Trend Test P-value = 0.01 |
| SFTPD         | Q2 vs. Q1                 | 2.01 (0.42)          | 0.51 (0.53)               |
|               | Q3 vs. Q1                 | 1.30 (0.89)          | 0.10 (0.02)               |
|               | Q4 vs. Q1                 | 1.41 (0.97)          | 0.44 (0.79)               |
|               | Trend Test P-value = 0.42 |                      | Trend Test P-value = 0.05 |
| CRP           | Q2 vs. Q1                 | ND                   | 0.82 (0.58)               |
|               | Q3 vs. Q1                 | ND                   | 0.76 (0.70)               |
|               | Q4 vs. Q1                 | ND                   | 0.27 (0.10)               |
|               | Trend Test P-value = N/A  |                      | Trend Test P-value = 0.08 |
| CCL18         | Q2 vs. Q1                 | 2.60 (0.46)          | 0.24 (0.10)               |
|               | Q3 vs. Q1                 | 1.78 (0.92)          | 1.93 (0.01)               |
|               | Q4 vs. Q1                 | 2.60 (0.46)          | 0.24 (0.11)               |
|               | Trend Test P-value = 0.19 |                      | Trend Test P-value = 0.30 |
| Nitrotyrosine | Q2 vs. Q1                 | ND                   | 2.20 (0.66)               |
|               | Q3 vs. Q1                 | ND                   | 3.43 (0.13)               |
|               | Q4 vs. Q1                 | ND                   | 1.45 (0.62)               |
|               | Trend Test P-value = N/A  |                      | Trend Test P-value = 0.29 |
| CCL-2         | Q2 vs. Q1                 | 2.11 (0.68)          | 0.46 (0.81)               |
|               | Q3 vs. Q1                 | 4.26 (0.26)          | 0.51 (0.99)               |
|               | Q4 vs. Q1                 | 4.91 (0.16)          | 0.29 (0.24)               |
|               | Trend Test P-value = 0.02 |                      | Trend Test P-value = 0.08 |

\* Cochran Armitage Test of Trend (1-sided); Qi = ith quartile;  
Abbreviations: BAL = Bronchoalveolar Lavage; ND=Not Detectable;  
CC-16, Clara cell protein-16; CCL-2, chemokine (C-C motif) ligand 2; CCL18, chemokine (C-C motif) ligand 18; CRP, c-reactive protein; GSH, total glutathione; IL-6, interleukin-6; MPO, myeloperoxidase, SFTPD, surfactant protein D.
